# Supplementary material
Source: publisher figshare collection journal article supplement (https://acs.figshare.com/ndownloader/files/4117384)
Supplement: Supplementary file 1 [file 4117384]

## Supplementary Information

### **Effect of $\text{Co}^{2+}$ substitution in the frame work of carbonate intercalated Cu/Cr LDH on structural, electronic, optical and photocatalytic properties**

Kulamani Parida\*, Lagnamayee Mohapatra, Niranjana Baliarsingh

*Colloids & Materials Chemistry Department, CSIR-Institute of Minerals & Materials Technology, Bhubaneswar-751013, Odissa, India.*

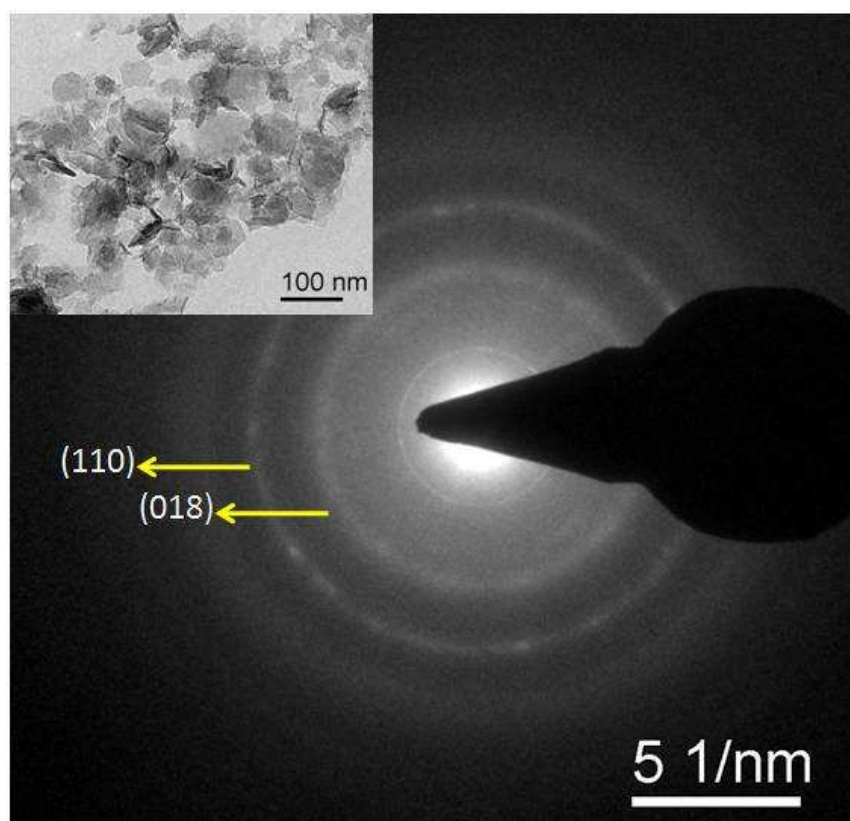

Figure S1 TEM images and SAED of all LDH4 material.

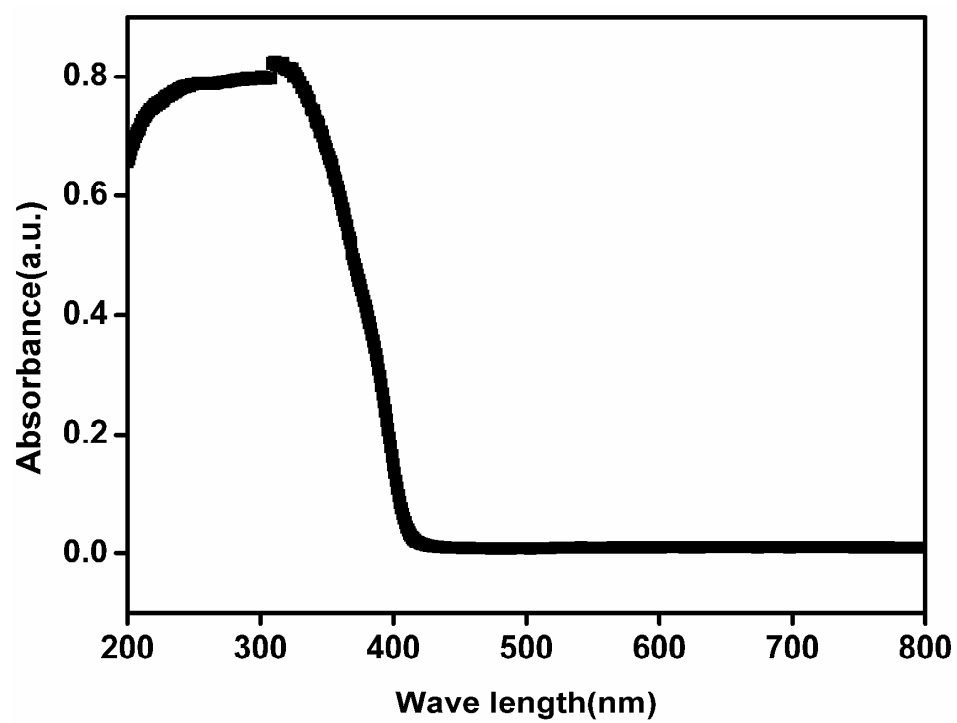

Figure S2 The UV-Vis DRS spectra of P25

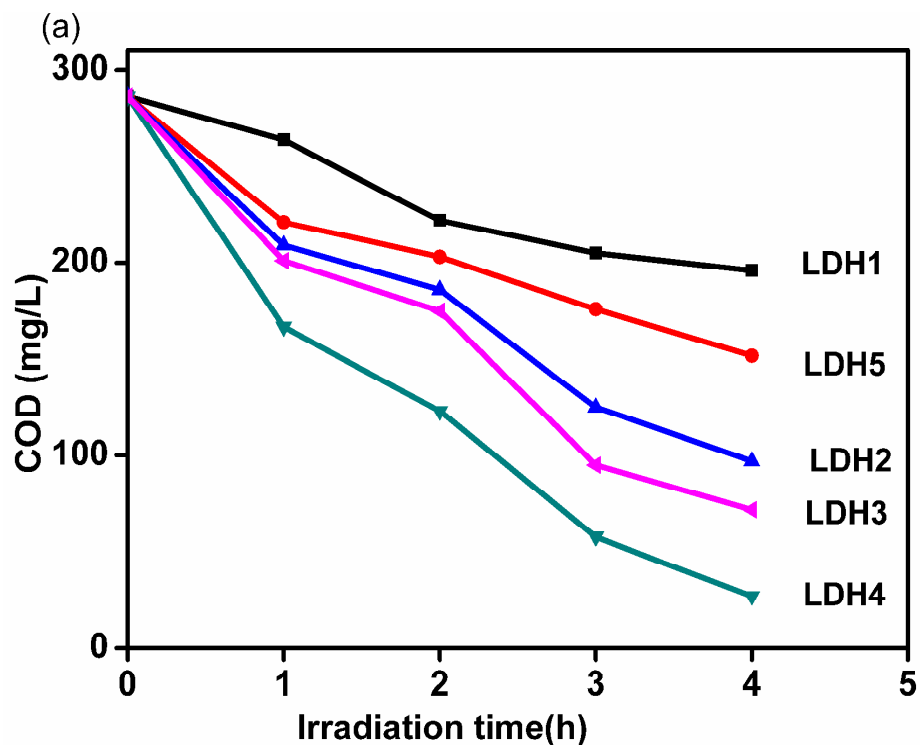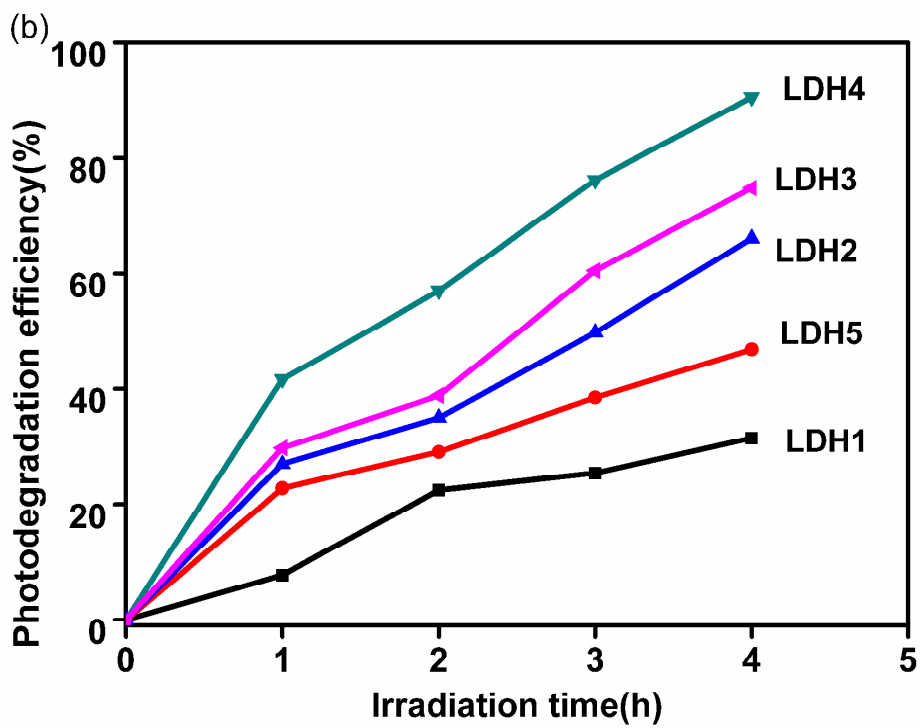

Figure S3. (a) Photocatalytic degradation of MG (100 ppm) with all prepared LDHs by COD (mg/L) and (b)photodegradation efficiency (%).

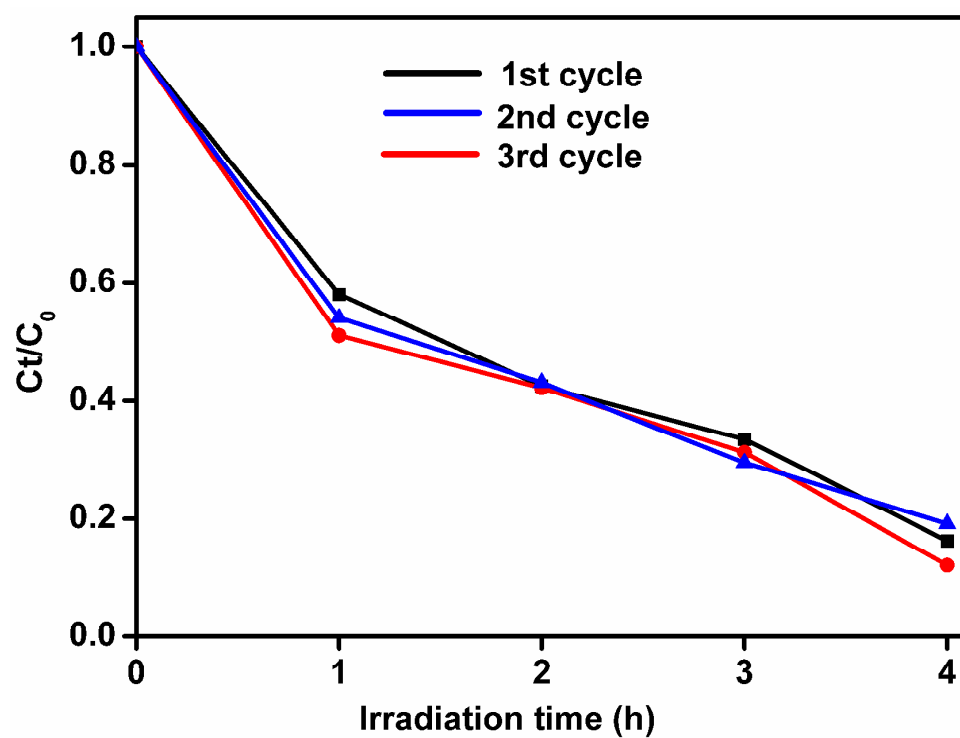

Figure S4. Recycling experiments over LDH4

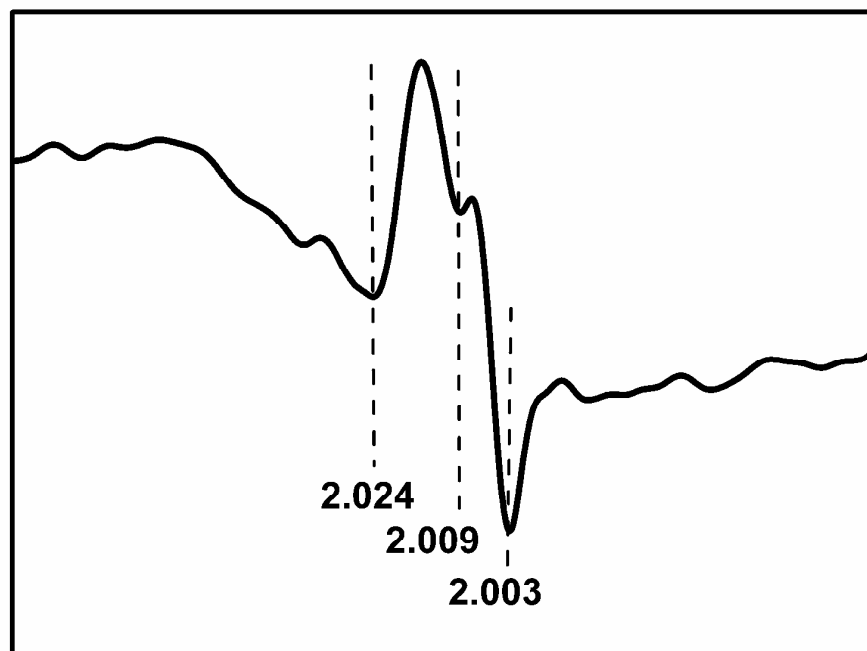

Figure S5 . EPR spectra of LDH4 sample

Table S1 Solar light intensity and % of MG degradation over all experiments.

| <b>Solar light intensity</b> | <b>% of degradation</b> |
|------------------------------|-------------------------|
| <b>10,4200 Lx</b>            | <b>88.5</b>             |
| <b>10,4100Lx</b>             | <b>88.0</b>             |
| <b>10,4000Lx</b>             | <b>87.2</b>             |
